# Supplementary material for: Changes in PRC1 activity during interphase modulate lineage transition in pluripotent cells
Source: PubMed Central journal article supplement (PMC9837203; doi:10.1038/s41467-023-35859-9), 2023-01-12
Supplement: 41467_2023_35859_MOESM2_ESM.pdf [file 41467_2023_35859_MOESM2_ESM.pdf]

## **Description of Additional Supplementary Files**

File Name: Supplementary Data 1

Description: Purity check of cell cycle–sorted FUCCI-mESCs used in this study.

File Name: Supplementary Data 2

Description: List of genes used in this manuscript.

File Name: Supplementary Data 3

Description: Raw data of colony forming assays.

File Name: Supplementary Data 4

Description: ChIP-seq enrichment and expression values.

File Name: Supplementary Data 5

Description: Reagents and published datasets used in this manuscript.
