# Supplementary material for: Changes in PRC1 activity during interphase modulate lineage transition in pluripotent cells
Source: PubMed Central journal article supplement (PMC9837203; doi:10.1038/s41467-023-35859-9), 2023-01-12
Supplement: 41467_2023_35859_MOESM8_ESM.pdf [file 41467_2023_35859_MOESM8_ESM.pdf]

## Reporting Summary

Nature Portfolio wishes to improve the reproducibility of the work that we publish. This form provides structure for consistency and transparency in reporting. For further information on Nature Portfolio policies, see our [Editorial Policies](#) and the [Editorial Policy Checklist](#).

### Statistics

For all statistical analyses, confirm that the following items are present in the figure legend, table legend, main text, or Methods section.

n/a Confirmed

- The exact sample size ( $n$ ) for each experimental group/condition, given as a discrete number and unit of measurement
- A statement on whether measurements were taken from distinct samples or whether the same sample was measured repeatedly
- The statistical test(s) used AND whether they are one- or two-sided  
*Only common tests should be described solely by name; describe more complex techniques in the Methods section.*
- A description of all covariates tested
- A description of any assumptions or corrections, such as tests of normality and adjustment for multiple comparisons
- A full description of the statistical parameters including central tendency (e.g. means) or other basic estimates (e.g. regression coefficient) AND variation (e.g. standard deviation) or associated estimates of uncertainty (e.g. confidence intervals)
- For null hypothesis testing, the test statistic (e.g.  $F$ ,  $t$ ,  $r$ ) with confidence intervals, effect sizes, degrees of freedom and  $P$  value noted  
*Give  $P$  values as exact values whenever suitable.*
- For Bayesian analysis, information on the choice of priors and Markov chain Monte Carlo settings
- For hierarchical and complex designs, identification of the appropriate level for tests and full reporting of outcomes
- Estimates of effect sizes (e.g. Cohen's  $d$ , Pearson's  $r$ ), indicating how they were calculated

*Our web collection on [statistics for biologists](#) contains articles on many of the points above.*

### Software and code

Policy information about [availability of computer code](#)

Data collection

Data analysis

For manuscripts utilizing custom algorithms or software that are central to the research but not yet described in published literature, software must be made available to editors and reviewers. We strongly encourage code deposition in a community repository (e.g. GitHub). See the Nature Portfolio [guidelines for submitting code & software](#) for further information.

### Data

Policy information about [availability of data](#)

All manuscripts must include a [data availability statement](#). This statement should provide the following information, where applicable:

- Accession codes, unique identifiers, or web links for publicly available datasets
- A description of any restrictions on data availability
- For clinical datasets or third party data, please ensure that the statement adheres to our [policy](#)

## Human research participants

Policy information about [studies involving human research participants and Sex and Gender in Research](#).

|                             |                                   |
|-----------------------------|-----------------------------------|
| Reporting on sex and gender | <input type="text" value="none"/> |
| Population characteristics  | <input type="text" value="none"/> |
| Recruitment                 | <input type="text" value="none"/> |
| Ethics oversight            | <input type="text" value="none"/> |

Note that full information on the approval of the study protocol must also be provided in the manuscript.

## Field-specific reporting

Please select the one below that is the best fit for your research. If you are not sure, read the appropriate sections before making your selection.

Life sciences       Behavioural & social sciences       Ecological, evolutionary & environmental sciences

For a reference copy of the document with all sections, see [nature.com/documents/nr-reporting-summary-flat.pdf](https://nature.com/documents/nr-reporting-summary-flat.pdf)

## Life sciences study design

All studies must disclose on these points even when the disclosure is negative.

|                 |                                                                                                                                 |
|-----------------|---------------------------------------------------------------------------------------------------------------------------------|
| Sample size     | <input type="text" value="Sample size were the set of genes with given features. We did not perform sample size calculation."/> |
| Data exclusions | <input type="text" value="no data exclusion."/>                                                                                 |
| Replication     | <input type="text" value="Independent biological triplicates were routinely carried out."/>                                     |
| Randomization   | <input type="text" value="Not relevant to this study."/>                                                                        |
| Blinding        | <input type="text" value="Not applicable."/>                                                                                    |

## Reporting for specific materials, systems and methods

We require information from authors about some types of materials, experimental systems and methods used in many studies. Here, indicate whether each material, system or method listed is relevant to your study. If you are not sure if a list item applies to your research, read the appropriate section before selecting a response.

### Materials & experimental systems

| n/a                                 | Involvement                         | Material/System               |
|-------------------------------------|-------------------------------------|-------------------------------|
| <input type="checkbox"/>            | <input checked="" type="checkbox"/> | Antibodies                    |
| <input type="checkbox"/>            | <input checked="" type="checkbox"/> | Eukaryotic cell lines         |
| <input checked="" type="checkbox"/> | <input type="checkbox"/>            | Palaeontology and archaeology |
| <input checked="" type="checkbox"/> | <input type="checkbox"/>            | Animals and other organisms   |
| <input checked="" type="checkbox"/> | <input type="checkbox"/>            | Clinical data                 |
| <input checked="" type="checkbox"/> | <input type="checkbox"/>            | Dual use research of concern  |

### Methods

| n/a                                 | Involvement                         | Method                 |
|-------------------------------------|-------------------------------------|------------------------|
| <input type="checkbox"/>            | <input checked="" type="checkbox"/> | ChIP-seq               |
| <input type="checkbox"/>            | <input checked="" type="checkbox"/> | Flow cytometry         |
| <input checked="" type="checkbox"/> | <input type="checkbox"/>            | MRI-based neuroimaging |

## Antibodies

|                 |                                                                                                                                                                                                                                                                                                      |
|-----------------|------------------------------------------------------------------------------------------------------------------------------------------------------------------------------------------------------------------------------------------------------------------------------------------------------|
| Antibodies used | <input type="text" value="Ring1b Cell signalling D22F2&lt;br/&gt;Ring1b MBL D139-3&lt;br/&gt;Cbx7 Abcam ab21873&lt;br/&gt;Rybp Millipore AB3637&lt;br/&gt;H2Ak119ub1 Cell signalling 8240&lt;br/&gt;Anti-mouse IgG Dako Z0259&lt;br/&gt;LaminB Santa Cruz Sc-6216&lt;br/&gt;Total H3 Abcam ab1791"/> |
|-----------------|------------------------------------------------------------------------------------------------------------------------------------------------------------------------------------------------------------------------------------------------------------------------------------------------------|

## Eukaryotic cell lines

Policy information about [cell lines and Sex and Gender in Research](#)

|                                                                      |                                                                                                                                                                                              |
|----------------------------------------------------------------------|----------------------------------------------------------------------------------------------------------------------------------------------------------------------------------------------|
| Cell line source(s)                                                  | Mouse ESCs derived from mouse blastocysts and genetically modified in vitro. Wild-type Fucci-mESCs, Ring1a <sup>-/-</sup> ;Ring1b <sup>fl/fl</sup> ;Rosa26::CreERT2-Fucci, AID::Ring1b;Fucci |
| Authentication                                                       | Flow cytometry sorting of Fucci cells, pluripotency markers analysis, western blot of target proteins and chip-pcr/seqs for Ring1b mutants.                                                  |
| Mycoplasma contamination                                             | Routinely tested: negative                                                                                                                                                                   |
| Commonly misidentified lines<br>(See <a href="#">ICLAC</a> register) | none                                                                                                                                                                                         |

## ChIP-seq

### Data deposition

- Confirm that both raw and final processed data have been deposited in a public database such as [GEO](#).
- Confirm that you have deposited or provided access to graph files (e.g. BED files) for the called peaks.

Data access links  
*May remain private before publication.* <https://www.ncbi.nlm.nih.gov/geo/query/acc.cgi?acc=GSE207997>

Files in database submission

GSM6329684 Ring1b-G1  
 GSM6329685 Ring1b-S  
 GSM6329686 Ring1b-G2  
 GSM6329687 Ring1b-MBL-G1  
 GSM6329688 Ring1b-MBL-S  
 GSM6329689 Ring1b-MBL-G2  
 GSM6329690 Ring1b-MBL-WT  
 GSM6329691 Ring1b-MBL-KO  
 GSM6329692 Rybp-G1  
 GSM6329693 Rybp-S  
 GSM6329694 Rybp-G2  
 GSM6329695 H2AK119ub1-G1  
 GSM6329696 H2AK119ub1-S  
 GSM6329697 H2AK119ub1-G2  
 GSM6329698 Cbx7-G1  
 GSM6329699 Cbx7-S  
 GSM6329700 Cbx7-G2  
 GSM6329701 RNA-Ring1b<sup>fl/fl</sup>-G1  
 GSM6329702 RNA-Ring1b<sup>fl/fl</sup>-S  
 GSM6329703 RNA-Ring1b<sup>fl/fl</sup>-G2  
 GSM6329704 RNA-Ring1bKO-G1  
 GSM6329705 RNA-Ring1bKO-S  
 GSM6329706 RNA-Ring1bKO-G2  
 GSM6329707 RNA-0h-G1-R1  
 GSM6329708 RNA-0h-G1-R2  
 GSM6329709 RNA-0h-S-R1  
 GSM6329710 RNA-0h-S-R2  
 GSM6329711 RNA-0h-G2-R1  
 GSM6329712 RNA-0h-G2-R2  
 GSM6329713 RNA-6h-UNT-G1-R1  
 GSM6329714 RNA-6h-UNT-G1-R2  
 GSM6329715 RNA-6h-UNT-S-R1  
 GSM6329716 RNA-6h-UNT-S-R2  
 GSM6329717 RNA-6h-UNT-G2-R1  
 GSM6329718 RNA-6h-UNT-G2-R2  
 GSM6329719 RNA-6h-IAA-G1-R1  
 GSM6329720 RNA-6h-IAA-G1-R2  
 GSM6329721 RNA-6h-IAA-S-R1  
 GSM6329722 RNA-6h-IAA-S-R2  
 GSM6329723 RNA-6h-IAA-G2-R1  
 GSM6329724 RNA-6h-IAA-G2-R2  
 GSM6329725 Ring1b<sup>fl/fl</sup>-G1-Six2-prom

GSM6329726 Ring1bfff1-G2-Six2-prom  
 GSM6631348 Ring1b-G1-Input  
 GSM6631349 Ring1b-S-Input  
 GSM6631350 Ring1b-G2-Input  
 GSM6631351 Ring1b-MBL-WT-Input  
 GSM6631352 Ring1b-MBL-KO-Input  
 GSM6631353 Rybp-H2AK119ub1-Cbx7-Input  
 GSM6631354 Ring1bfff1-G1  
 GSM6631355 Ring1bfff1-G2  
 GSM6631356 Ring1bKO-G1  
 GSM6631357 Ring1bKO-G2

Genome browser session  
 (e.g. [UCSC](https://genome.ucsc.edu))

<https://genome.ucsc.edu/s/jordi.martorell/PRC1>

## Methodology

Replicates

Chips were analyzed by chip-pcr triplicates using published primers for positive and negative control regions. Libraries of representative samples were synthesized and sequenced.

Sequencing depth

20-30 million reads [50–base pair (bp) single reads] were obtained for each library.

Antibodies

Cell signalling D22F2  
 MBL D139-3  
 Abcam ab21873  
 Millipore AB3637  
 Cell signalling 8240  
 Dako Z0259  
 Santa Cruz Sc-6216

Peak calling parameters

STAR --readFilesIn sample.fastq.gz --genomeDir ./STAR\_genome\_mm9/ --runThreadN 16 --outFileNamePrefix star\_mapping/sample --outSAMtype BAM SortedByCoordinate --outWigType wiggle --outWigNorm RPM --outWigStrand Unstranded  
 macs2 callpeak -c star\_mapping/INPUT.bam -t star\_mapping/sample.bam -f BAM -g mm -n peaks/sample.bam -B --SPMR -p 0.001

Data quality

Comparison of peak number, peaks profiles (by IGV) and enrichment (through correlation analyses) with published data.  
 Ring1b (FDR 0.01): total peaks G1(16009), S (18129), G2(15108)  
 Ring1b-MBL (FDR 0.05): total peaks G1(4488), S (8748), G2(5590)  
 Rybp (FDR 0.01): total peaks G1(4233), S (17880), G2(15525)  
 H2AK119ub1 (p-value<0.001): total peaks G1(234), S (753), G2(1588)  
 Cbx7 (FDR 0.05): total peaks G1(3810), S (3473), G2(5219)

Software

STAR 2.5.2, SAMtools 1.3.1, MACS2, CoverageView 1.20.0, GraphPad 7, Enrichr ([www.maayanlab.cloud/Enrichr](http://www.maayanlab.cloud/Enrichr)),

## Flow Cytometry

### Plots

Confirm that:

- The axis labels state the marker and fluorochrome used (e.g. CD4-FITC).
- The axis scales are clearly visible. Include numbers along axes only for bottom left plot of group (a 'group' is an analysis of identical markers).
- All plots are contour plots with outliers or pseudocolor plots.
- A numerical value for number of cells or percentage (with statistics) is provided.

### Methodology

Sample preparation

Live cells were resuspended in buffer for sorting.

Instrument

Aria Fusion

Software

Aria Fusion software.

Cell population abundance

Please, see table S1.

Gating strategy

As shown in figure S1A, live cells were gated depending on their expression of Citrine and Cherry fluorescent proteins.

- Tick this box to confirm that a figure exemplifying the gating strategy is provided in the Supplementary Information.
